# Supplementary material
Source: publisher site journal article supplement (https://www.dovepress.com/article/283488)
Supplement: Supplementary file 1 [file get_supplementary_file.php]

**Supplementary Materials**

**Table S1: List of Antibiotics Given and their Appropriateness MDR Enterobacteriaceae Isolates**

|  | **No. (n=130)** | **%** | **Appropriateness** | **%** |
| --- | --- | --- | --- | --- |
| **No Antibiotics** | **(n= 25)** | 19.23 | 0 | 0.00 |
| **Mono therapy, total** | **(n= 71)** | 54.61 | 53 | 74.64 |
| Piperacillin/tazobactam | 31 | 43.66 | 23 | 74.19 |
| Carbapenems | 24 | 33.80 | 24 | 100.0 |
| Cephalosporin | 8 | 11.26 | 2 | 25.00 |
| Aminoglycosides | 3 | 4.22 | 2 | 66.67 |
| Trimethoprim/sulfamethoxazole | 3 | 4.22 | 0 | 0.00 |
| Colistin | 1 | 1.40 | 1 | 100.00 |
| Tigecycline | 1 | 1.40 | 1 | 100.00 |
| **Combination therapy, total** | **(n= 34)** | 26.15 | 30 | 88.23 |
| Aminoglycosides, Carbapenem | 5 | 14.70 | 5 | 100.00 |
| Piperacillin/tazobactam, Carbapenem | 3 | 8.82 | 3 | 100.00 |
| Piperacillin/tazobactam, Fluroquinolone | 3 | 8.82 | 2 | 66.67 |
| Cephalosporin, Fluroquinolone, Piperacillin/tazobactam | 3 | 8.82 | 3 | 100.00 |
| Piperacillin/tazobactam, Fluroquinolone, Cephalosporin, Colistin | 3 | 8.82 | 3 | 100.00 |
| Colistin and carbapenem | 2 | 5.88 | 2 | 100.00 |
| Cephalosporin, Carbapenem, Piperacillin/tazobactam | 2 | 5.88 | 1 | 50.00 |
| Carbapenem and Trimethoprim/sulfamethoxazole | 2 | 5.88 | 2 | 100.00 |
| Aminoglycosides, Tigecycline, Carbapenem | 1 | 2.94 | 1 | 100.00 |
| Piperacillin/tazobactam, Cephalosporin | 1 | 2.94 | 1 | 100.00 |
| Cephalosporin, Fluroquinolone | 1 | 2.94 | 1 | 100.00 |
| Carbapenem, Cephalosporin | 1 | 2.94 | 1 | 100.00 |
| Cephalosporin and Trimethoprim/sulfamethoxazole | 1 | 2.94 | 1 | 100.00 |
| Trimethoprim/sulfamethoxazole, Piperacillin/tazobactam, Fluroquinolone, Carbapenem | 1 | 2.94 | 1 | 100.00 |
| Aminoglycosides and Colistin | 1 | 2.94 | 0 | 0.00 |
| Carbapenem, Colistin, Fluroquinolone | 1 | 2.94 | 1 | 100.00 |
| Piperacillin/tazobactam, Aminoglycosides, Carbapenem, Colistin | 1 | 2.94 | 0 | 0.00 |
| Fluroquinolone and Tigecycline | 1 | 2.94 | 1 | 100.00 |
| Piperacillin/tazobactam, Aminoglycosides, Cephalosporin | 1 | 2.94 | 1 | 100.00 |
| Colistin, Piperacillin/tazobactam | 0 | 0.00 | 0 | 0.00 |

MDR, multidrug resistance

**Table S2: List of Antibiotics Given and their Appropriateness XDR Enterobacteriaceae Isolates**

|  | **No. (n=8)** | **%** | **Appropriateness** | **%** |
| --- | --- | --- | --- | --- |
| **No Antibiotics** | **(n= 0)** | 0.00 | 0 | 0.00 |
| **Mono Therapy, total** | **(n= 6)** | 75.00 | 1 | 16.66 |
| Carbapenems | 3 | 50.00 | 1 | 33.33 |
| Piperacillin/Tazobactam | 2 | 33.33 | 0 | 0.00 |
| Cephalosporin | 1 | 16.66 | 0 | 0.00 |
| **Combination Therapy, total** | **(n= 2)** | 25.00 | 1 | 50 |
| Aminoglycosides, Carbapenem | 1 | 50.00 | 0 | 0.00 |
| Carbapenem, Tigecycline, Fluroquinolone | 1 | 50.00 | 1 | 100.00 |

XDR, extensively drug-resistant.
